# Supplementary material for: Prophylactic Treatment of Undernourished Mice with Cotrimoxazole Induces a Different Profile of Dysbiosis with Functional Metabolic Alterations
Source: MDPI journal article supplement (doi:10.3390/cells11152278), 2022-07-23
Supplement: s1 [file s1]

A

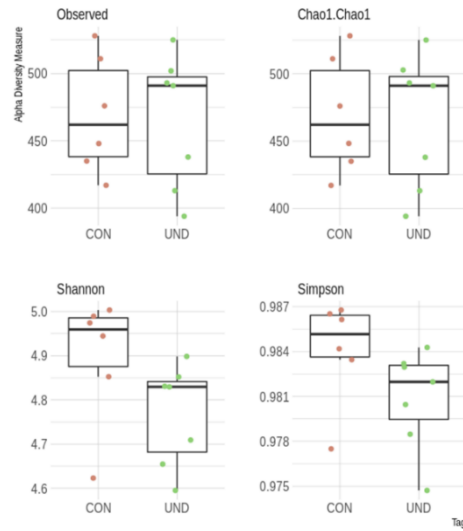

B

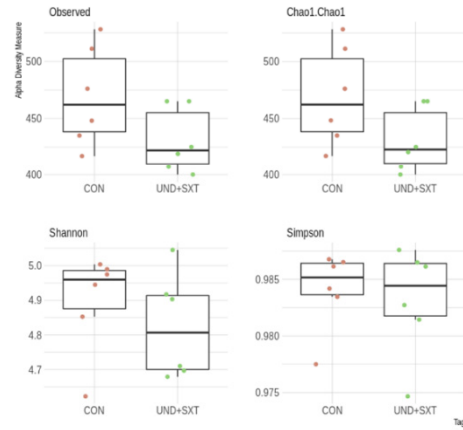

C

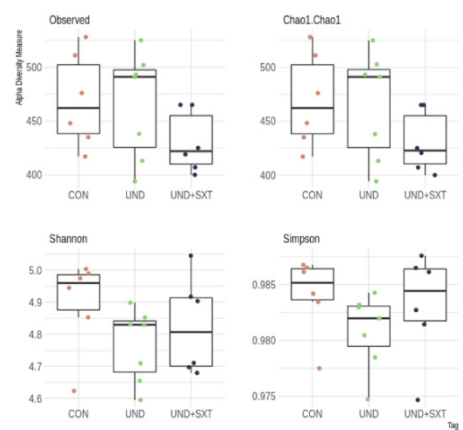

**Figure S1.** Richness (Observed and Chao1) and diversity (Shannon and Simpson) indexes for the gut microbiota. (a) Control (CON) and undernourished (UND) C57BL/6 mice. (b) Control (CON) and cotrimoxazole-treated undernourished (UND-SXT) C57BL/6 mice. (c) Control (CON), undernourished (UND), and cotrimoxazole-treated undernourished (UND-SXT) C57BL/6 mice.

**Table S1.** ANCOM-BC analysis showing W test statistic (mean difference/SE), p-value and FRD p-value for differently significant genus in the gut microbiota of CON (n = 6), UND (n = 7), and UND+SXT (n = 6) C57BL/6 mice. \* Increased in UND+SXT mice when compared to CON and UND mice; \*\* reduced in UND+SXT mice when compared to CON and UND mice.

| Family             | Genus                            | W         | p-value   | FDR p-value |
|--------------------|----------------------------------|-----------|-----------|-------------|
| S24-7              | Unclassified                     | 67.039100 | 0.0000000 | 0.0000000   |
| Enterobacteriaceae | <i>Klebsiella</i>                | 8.339968  | 0.0000000 | 0.0000000   |
| Alcaligenaceae     | <i>Sutterella</i> **             | 45.898923 | 0.0000000 | 0.0000000   |
| Porphyromonadaceae | <i>Parabacteroides</i> **        | 16.378670 | 0.0005552 | 0.0030702   |
| Caulobacteraceae   | Unclassified                     | 20.140173 | 0.0000847 | 0.0005601   |
| F16                | Unclassified                     | 16.822358 | 0.0004447 | 0.0025546   |
| Enterobacteriaceae | Unclassified                     | 21.668384 | 0.0000394 | 0.0002756   |
| Lachnospiraceae    | <i>Coproccoccus</i>              | 10.504023 | 0.0104739 | 0.0398010   |
| Ruminococcaceae    | <i>Faecalibacterium</i>          | 25.202518 | 0.0000067 | 0.0000780   |
| Turicibacteraceae  | <i>Turicibacter</i>              | 1.225840  | 0.0000000 | 0.0000000   |
| Streptococcaceae   | <i>Lactococcus</i> **            | 1.612983  | 0.0000000 | 0.0000000   |
| Pasteurellaceae    | <i>Haemophilus</i> **            | 10.896281 | 0.0000000 | 0.0000000   |
| Clostridiaceae     | <i>Candidatus Arthromitus</i> ** | 13.439776 | 0.0024133 | 0.0114634   |
| Clostridiaceae     | Unclassified**                   | 45.393331 | 0.0000000 | 0.0000000   |
| Ruminococcaceae    | <i>Anaerotruncus</i> *           | 3.069544  | 0.0000000 | 0.0000000   |
| Streptococcaceae   | <i>Streptococcus</i> **          | 25.239520 | 0.0000066 | 0.0000780   |
| Veillonellaceae    | <i>Veillonella</i> **            | 25.138432 | 0.0000070 | 0.0000780   |
| [Odoribacteraceae] | <i>Odoribacter</i> **            | 14.062713 | 0.0017675 | 0.0085045   |
| Campylobacteraceae | <i>Campylobacter</i>             | 24.745761 | 0.0000085 | 0.0000780   |
| Lachnospiraceae    | <i>Anaerostipes</i> **           | 5.570561  | 0.0000000 | 0.0000000   |
| Coriobacteriaceae  | <i>Adlercreutzia</i> **          | 16.787884 | 0.0000000 | 0.0000000   |
| Sphingomonadaceae  | <i>Sphingomonas</i>              | 10.801724 | 0.0090254 | 0.0355734   |
| Clostridiaceae     | <i>Clostridium</i> **            | 53.433144 | 0.0000000 | 0.0000000   |
| Lachnospiraceae    | <i>Lachnospira</i>               | 25.166225 | 0.0000069 | 0.0000780   |
